# Supplementary material
Source: Springer Nature journal article supplement (https://www.springermedizin.de/resource/supplementary/13613_2012_130_MOESM2_ESM.pdf/12196280)

$p < 0.001$

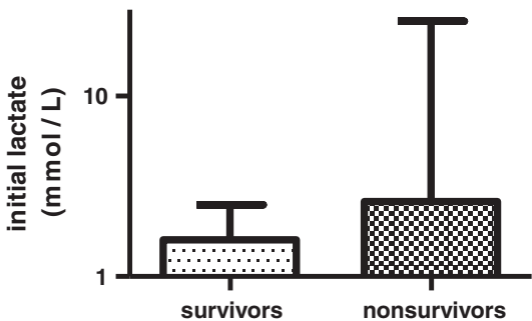

$p < 0.001$

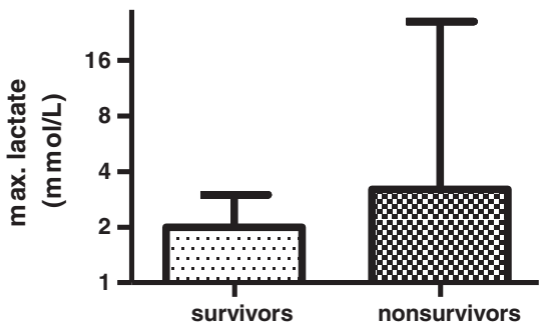

$p < 0.001$

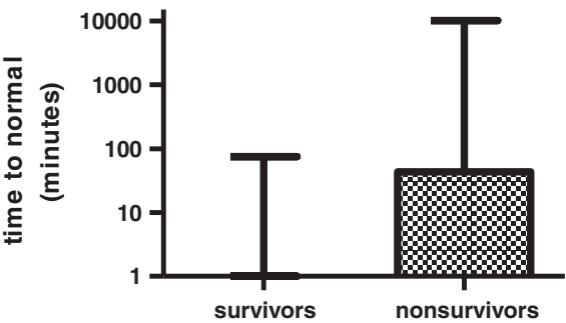

Supplement: MOESM2 [file 12196280]
